TITLE : REGIONAL BRAIN FUNCTION DURING HALOTHANE ANESTHESIA

AUTHORS : R.A.Hawkins, Ph.D., J.Fornadley, B.Helm, A.M.Mans and J.F.Biebuyck, M.B.Ch.B., D.Phil.

AFFILIATION: Department of Anesthesia, The Pennsylvania State University, College of Medicine,  
The Milton S. Hershey Medical Center, Hershey, Pennsylvania 17033

**Introduction.** It has long been known that some anesthetics may interfere with synaptic transmission thus presumably interrupting nerve cell function and circuits (1), perhaps selectively (2). Another more common observation is that during anesthesia cerebral oxygen metabolism (CMR<sub>O2</sub>) is depressed (3). It follows from these observations that a substantial decrease of nerve cell activity has occurred. Whether these changes are region specific or generally distributed is of importance to understanding the physiological basis of anesthesia. Since CMR<sub>O2</sub> is stoichiometrically related to the rate of glucose utilization (CMR<sub>glu</sub>), we measured regional CMR<sub>glu</sub> (rCMR<sub>glu</sub>) in rats anesthetized with 0.5-1.5% halothane as the next logical step in studying the mechanism of anesthesia.

**Methods.** All rats were paralyzed and artificially ventilated to maintain P<sub>CO2</sub> (35-42 Torr) and P<sub>O2</sub> (>90 Torr). Body temperature was kept at 37.5°C and the electroencephalograph monitored continuously. rCMR<sub>glu</sub> was measured using [2-<sup>14</sup>C]glucose as previously described (4). Briefly, a single injection of [2-<sup>14</sup>C]glucose was given intravenously and plasma glucose specific activity monitored thereafter. At 10 minutes rats were killed, brains removed and sections of 20µm thickness were cut for quantitative autoradiography. The amount of <sup>14</sup>C in any given region was determined densitometrically by comparison to calibrated standards. This quantitative divided by the plasma glucose specific activity integral yields rCMR<sub>glu</sub>. Inspired halothane was delivered at 0%, 0.5%, 1.0% and 1.5% in oxygen for a period of one hour to allow for equilibration. Considerably shorter times (about 5-10 mins) were necessary to reach a steady state as judged by EEG changes.

**Results.** Table 1 contains rCMR<sub>glu</sub> measured in discrete brain areas at the various inspired halothane concentrations.

**Discussion.** It is clear that at 1.5% halothane there is a general depression (15% average) in most of the areas examined. Although not all reached statistical significance, the trend is obvious and the results are in reasonable agreement with earlier measurements (5,6). The greatest effect was in those areas concerned with auditory or visual systems. Interestingly the thalamus, including the anterior thalamic nuclei, part of Papez's circuit, were depressed, while no effect was observable on the reticular formation. The pattern observed differs somewhat from that found by Shapiro et al. studying the effect of 0.8% halothane on the incorporation of <sup>14</sup>C-deoxyglucose into brain of monkeys (6).

The relationship between anesthetic potency and metabolic depression is less obvious. At 0.5%, which we find sufficient to maintain surgical anesthesia, the changes in rCMR<sub>glu</sub> are slight and in fact cortical activity is actually increased in the frontal and parietal areas. These results suggest that the early effect of halothane at low concentrations may be to interfere with the orderly behavior of neuronal circuits, thus altering awareness.

Table 1  
Regional Glucose Utilization  
All values are given in µmol/min per 100 g.  
The symbols \* and \*\* indicate statistical significance at the 5 and 1% levels respectively as compared to unanesthetized controls.

|                     | 0%  | 0.5% | 1.0% | 1.5%  |
|---------------------|-----|------|------|-------|
| Frontal cortex      | 92  | 98*  | 82*  | 79*   |
| Parietal cortex     | 100 | 108* | 92*  | 90*   |
| Occipital cortex    | 91  | 94   | 84*  | 79*   |
| Temporal cortex     | 100 | 102  | 90*  | 88*   |
| Insular cortex      | 77  | 83   | 66*  | 64*   |
| Pyriform cortex     | 70  | 72   | 62*  | 65    |
| Hippocampus         | 62  | 62   | 62   | 56    |
| Septal nuclei       | 55  | 55   | 49   | 50*   |
| Anterior thalamus   | 119 | 102  | 102  | 90**  |
| Ventral thalamus    | 94  | 80   | 85   | 72*   |
| Hypothalamus        | 58  | 58   | 62   | 59    |
| Lateral geniculate  | 88  | 82   | 83   | 69**  |
| Medial geniculate   | 106 | 92   | 91   | 79**  |
| Superior colliculus | 83  | 83   | 89   | 75    |
| Inferior colliculus | 141 | 126  | 111  | 104** |
| Striatum            | 87  | 75   | 76   | 70*   |
| Globus pallidus     | 43  | 46   | 45   | 43    |
| Amygdala            | 68  | 72   | 71   | 62    |
| Interpeduncular     | 111 | 104  | 133  | 113   |
| Substantia nigra    | 70  | 62   | 62   | 60    |
| Reticular formation | 56  | 57   | 58   | 54    |
| Cerebellar cortex   | 100 | 85   | 85   | 69*   |
| Pons                | 71  | 67   | 67   | 64    |

#### References.

1. Larrabee MC, Posternak JM: Selective action of anesthetics on synapses and axons in mammalian sympathetic ganglia. *J Neurophysiol.* 15:91-114, 1952
2. Smith AL, Wollman H: Cerebral blood flow and metabolism: effects of anesthetic drugs and techniques. *Anesthesiology* 36:378-400, 1972
3. Theye RA, Michenfelder JD: The effect of halothane on canine cerebral metabolism. *Anesthesia* 29:113-118, 1968.
4. Rosner BS, Clark DL: Neurophysiologic effects of general anesthetics: II sequential regional actions in the brain. *Anesthesiology* 39:59-81, 1973
5. Hawkins RA, Hass WK, Ransohoff J: Advantages of [2-<sup>14</sup>C]glucose for regional glucose utilization. *Acta Physiol Scand (Suppl 64)* 56:436-437, 1977
6. Shapiro HM, Greenberg JH, Reivich M, Ashmead G, Sokoloff L: Local cerebral glucose uptake in awake and halothane-anesthetized primates. *Anesthesiology* 48:97-103, 1978
